# Supplementary material for: Refining grains and optimizing grain boundaries by Al2Yb to enable a dendrite-free lithium anode
Source: Royal Society of Chemistry journal article supplement (doi:10.1039/d4ee00411f), 2024-01-01
Supplement: d4ee00411f1.pdf [file d4ee00411f1.pdf]

## Supplementary Information

### Refining Grain and Optimizing Grain Boundary by Al<sub>2</sub>Yb to Enable the Dendrite-free Lithium Anode

Yunlong Deng<sup>†, a</sup>, Jian Gao<sup>†, a, b, \*</sup>, Ming Wang<sup>a</sup>, Jinxiang Deng<sup>a</sup>, Yicheng Zhou<sup>a</sup> and  
Wei Sun<sup>b, \*</sup>

Y. Deng, Prof. J. Gao, Dr. M. Wang, J. Deng, Y. Zhou

<sup>a</sup> New Energy Materials Laboratory, Sichuan Changhong Electric Co.; Ltd.; Chengdu,  
610041, China.

Prof. W. Sun

<sup>b</sup> School of Materials and Energy, University of Electronic Science and Technology of  
China, Chengdu 611731, China.

<sup>†</sup> These authors contributed equally to this work.

\*Corresponding authors: gaojian@changhong.com (J. Gao), weisun@uestc.edu.cn (W.  
Sun)

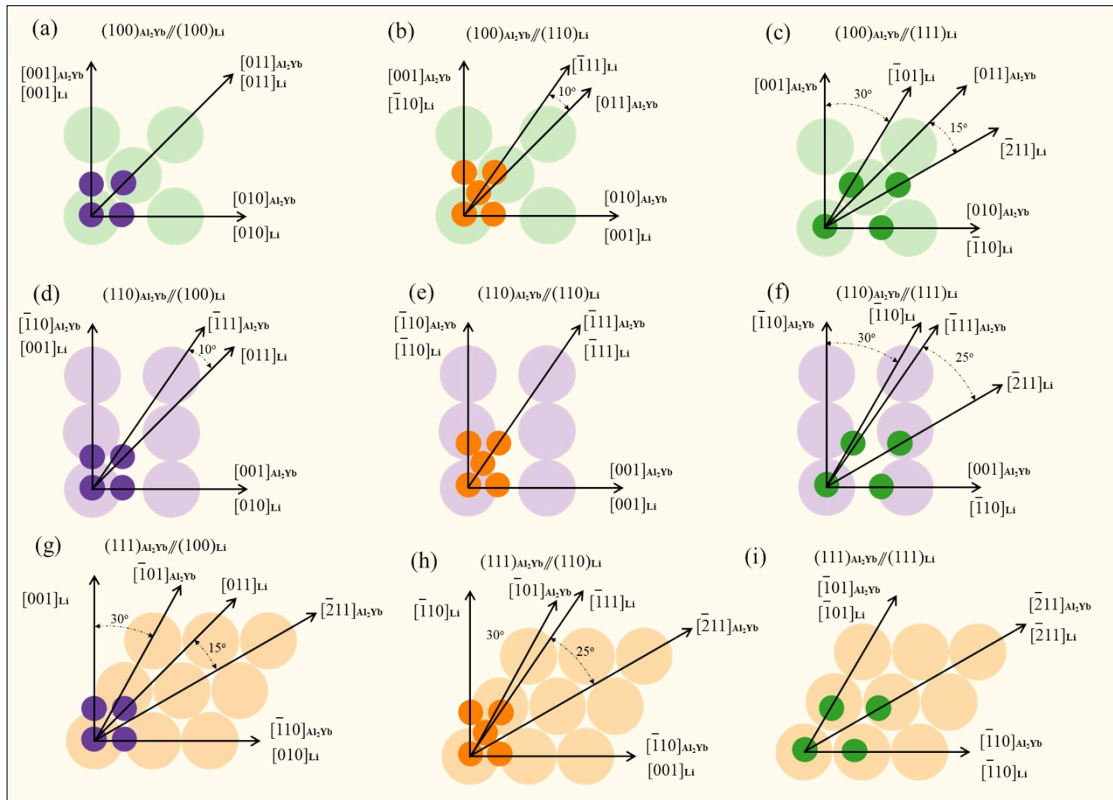

**Supplementary Figure 1** The crystallographic orientation relationships between  $\text{Al}_2\text{Yb}$  and  $\beta\text{-Li}$  (large circle:  $\text{Al}_2\text{Yb}$  atom; small circle: Li atom)

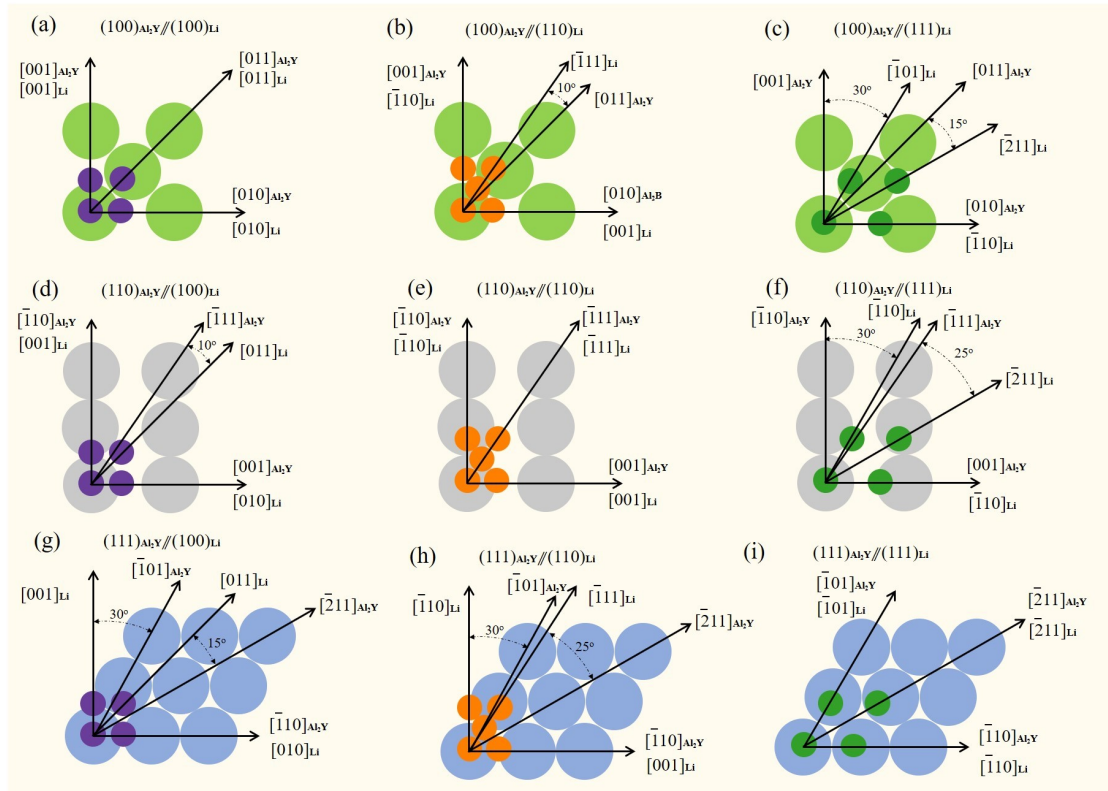

**Supplementary Figure 2** The crystallographic orientation relationships between  $\text{Al}_2\text{Y}$  and  $\beta\text{-Li}$  (large circle:  $\text{Al}_2\text{Y}$  atom; small circle: Li atom)

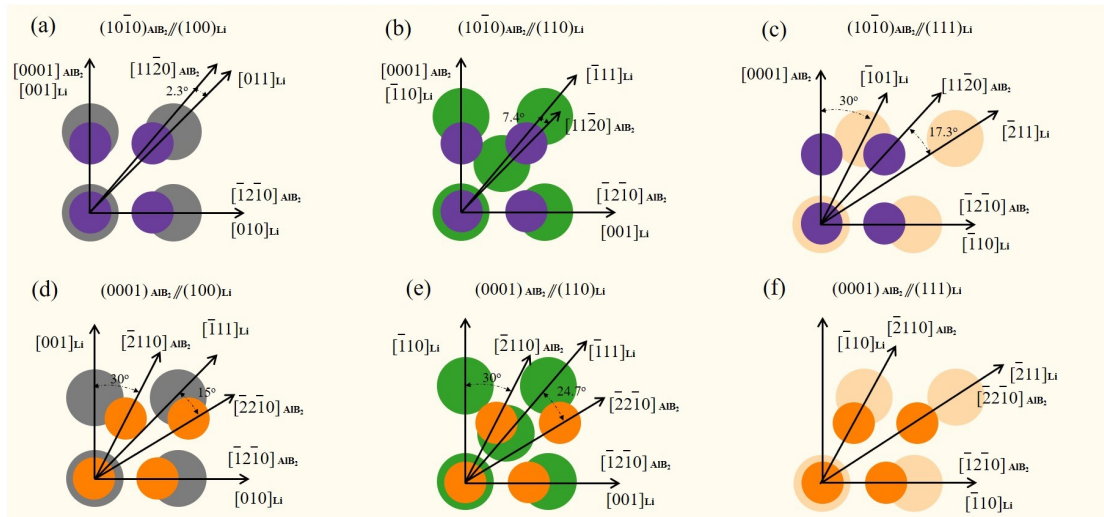

**Supplementary Figure 3** The crystallographic orientation relationships between AIB<sub>2</sub> and β-Li (large circle: Li atom; small circle: Al<sub>2</sub>B atom)

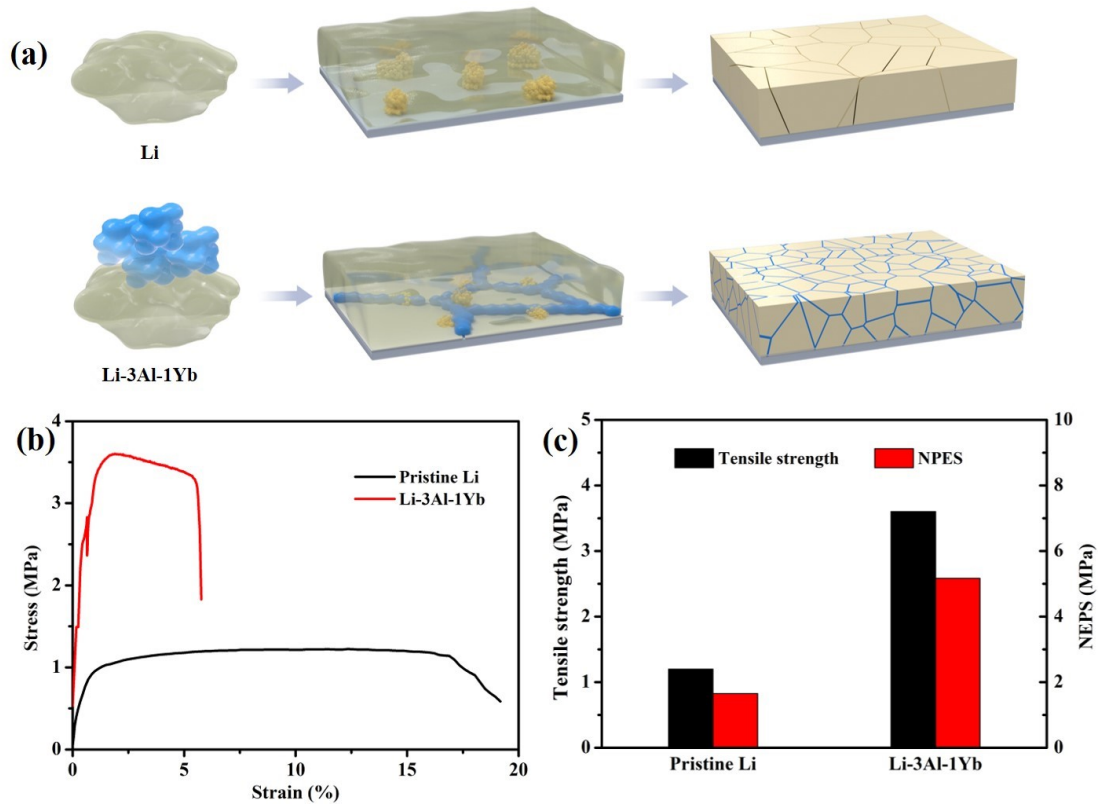

**Supplementary Figure 4** (a) The formation process of composite alloy anode materials; (b) The stress strain curve; (c) The tensile strength and the Non-Proportional Extensional Strength.

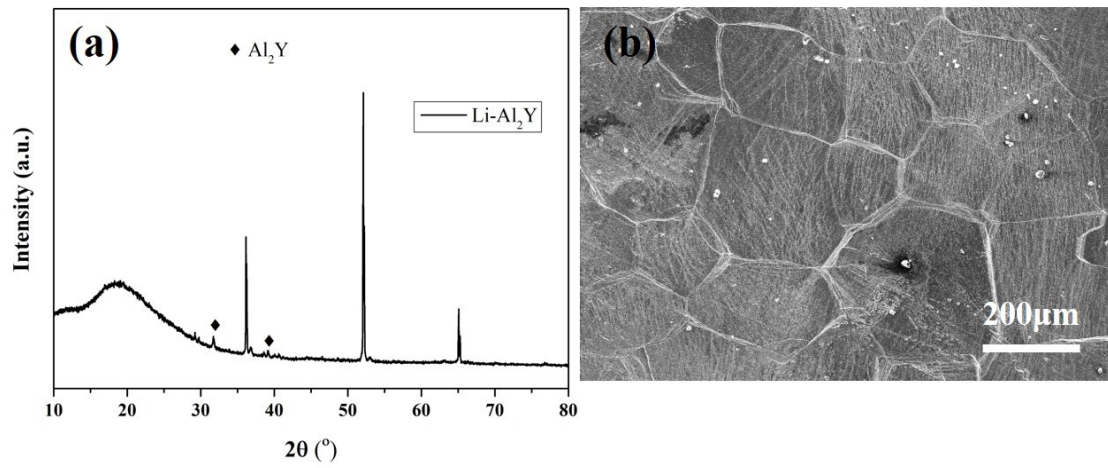

**Supplementary Figure 5** (a) The XRD patterns of the  $\text{Li-Al}_2\text{Y}$  sample; (b) The SEM image for the surface of  $\text{Li-Al}_2\text{Y}$  alloy material after etching.

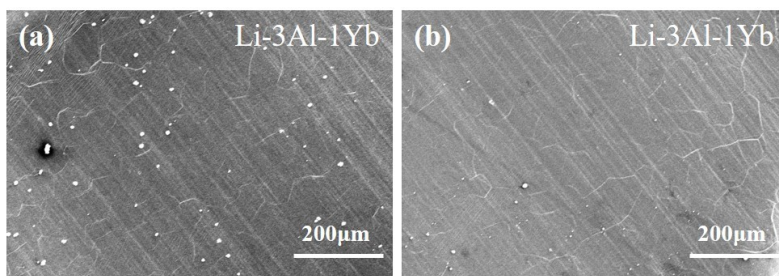

**Supplementary Figure 6** (a) and (b) the surface of Li-3Al-1Yb alloy electrode materials from various areas.

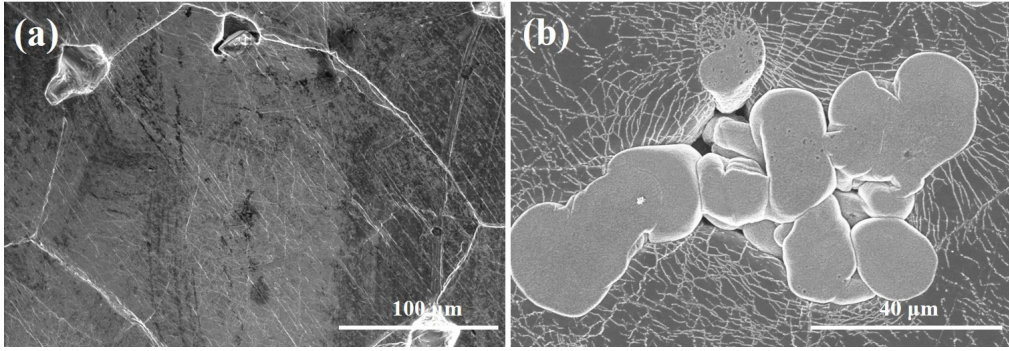

**Supplementary Figure 7** Scanning electron microscopy (SEM) images for metallic Li anode material: (a) stripping and (b) plating at  $0.5 \text{ mA cm}^{-2}$ .



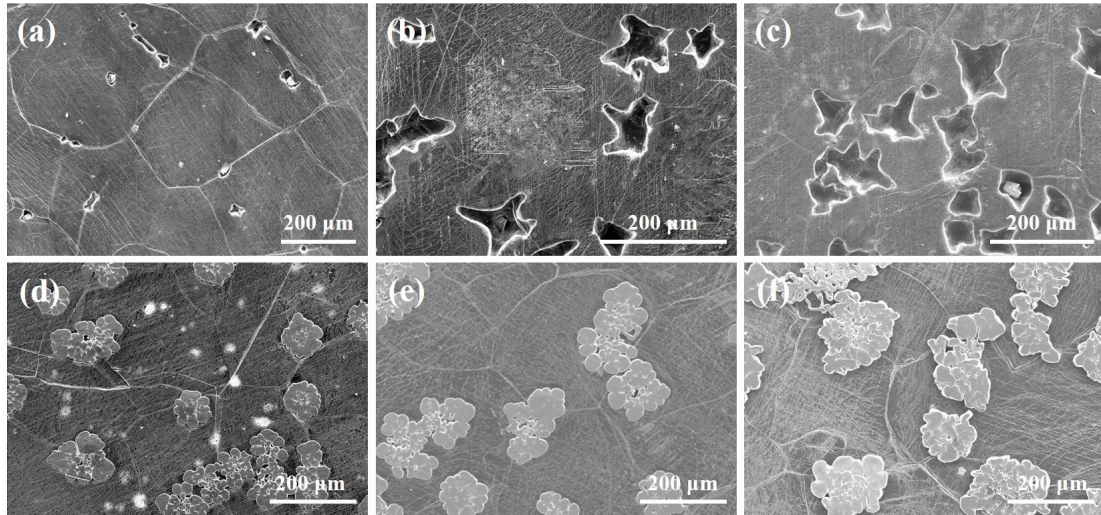

**Supplementary Figure 8** Large-scale scanning electron microscopy (SEM) images for metallic Li anode: stripping for (a)  $0.5 \text{ mAh cm}^{-2}$ , (b)  $1 \text{ mAh cm}^{-2}$  and (c)  $3 \text{ mAh cm}^{-2}$ ; plating for (d)  $0.5 \text{ mAh cm}^{-2}$ , (e)  $1 \text{ mAh cm}^{-2}$  and (f)  $3 \text{ mAh cm}^{-2}$ .

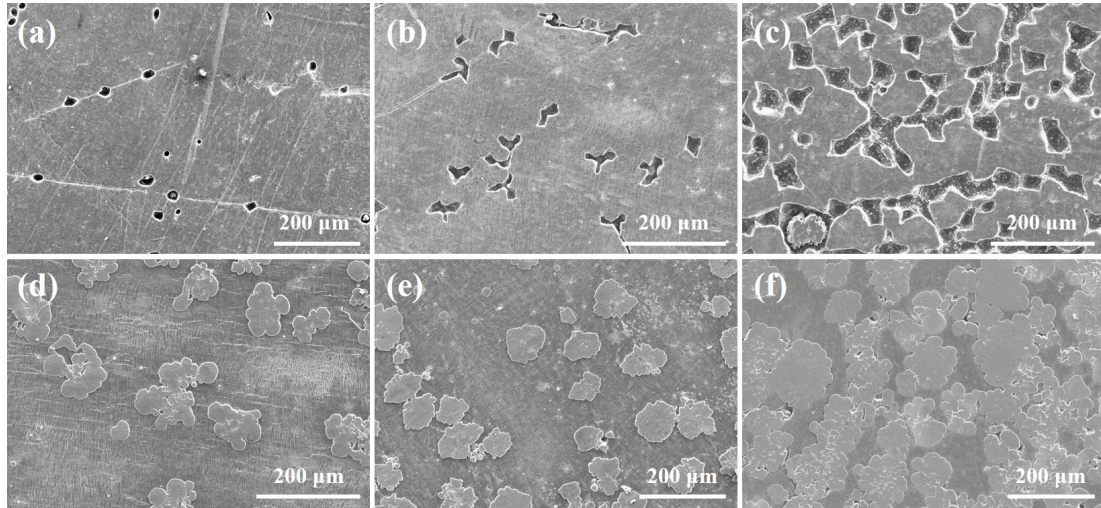

**Supplementary Figure 9** Large-scale scanning electron microscopy (SEM) images for Li-3Al-1Yb alloy anode: stripping for (a) 0.5 mAh cm<sup>-2</sup>, (b) 1 mAh cm<sup>-2</sup> and (c) 3 mAh cm<sup>-2</sup>; plating for (d) 0.5 mAh cm<sup>-2</sup>, (e) 1 mAh cm<sup>-2</sup> and (f) 3 mAh cm<sup>-2</sup>.

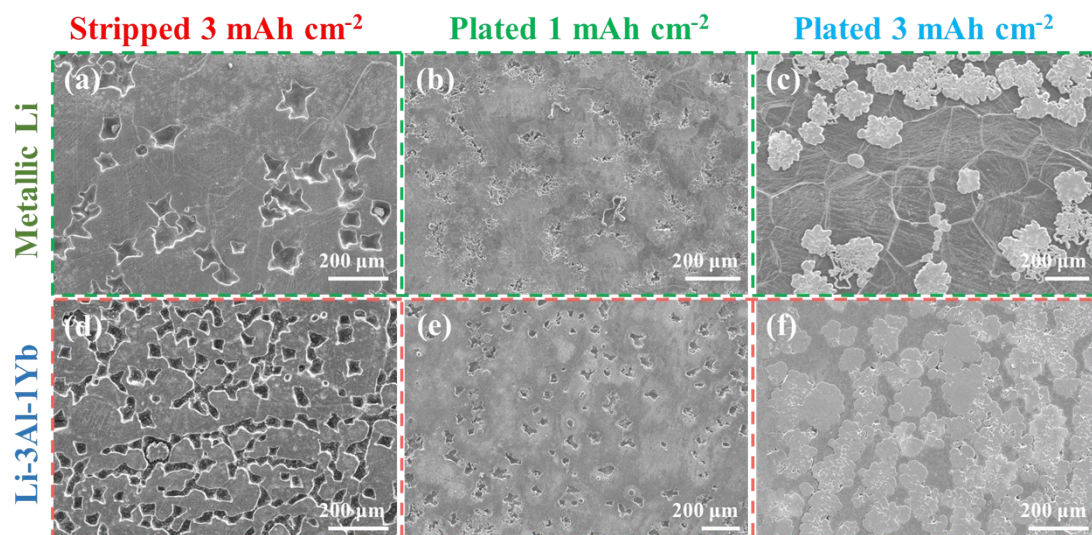

**Supplementary Figure 10** Scanning electron microscopy (SEM) images: stripped 3 mAh cm<sup>-2</sup> for (a) Li and (d) Li-3Al-1Yb at 0.5 mA cm<sup>-2</sup>; plated for (b, c) Li and (e, f) Li-3Al-1Yb at 0.5 mA cm<sup>-2</sup>.

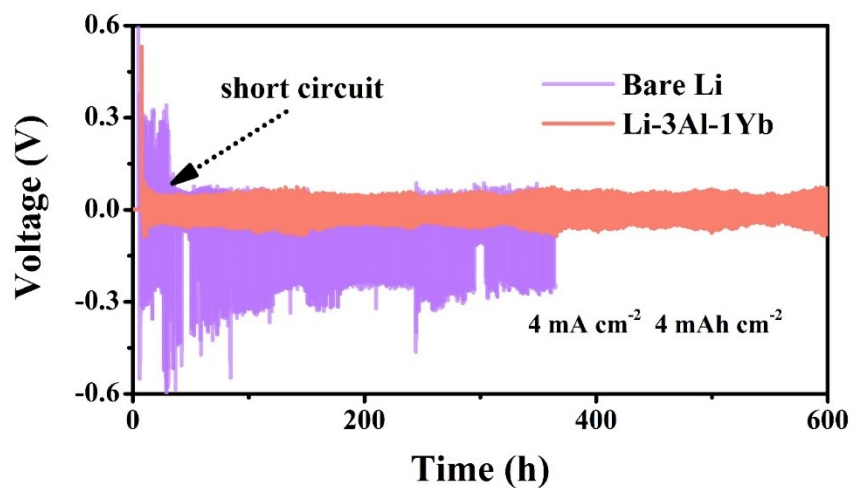

**Supplementary Figure 11** the cycle performance at the current density of  $4 \text{ mA cm}^{-2}$  (plating/stripping capacity:  $4 \text{ mAh cm}^{-2}$ ) for bare Li and Li-3Al-1Yb anode in Li||Li symmetrical cell systems.

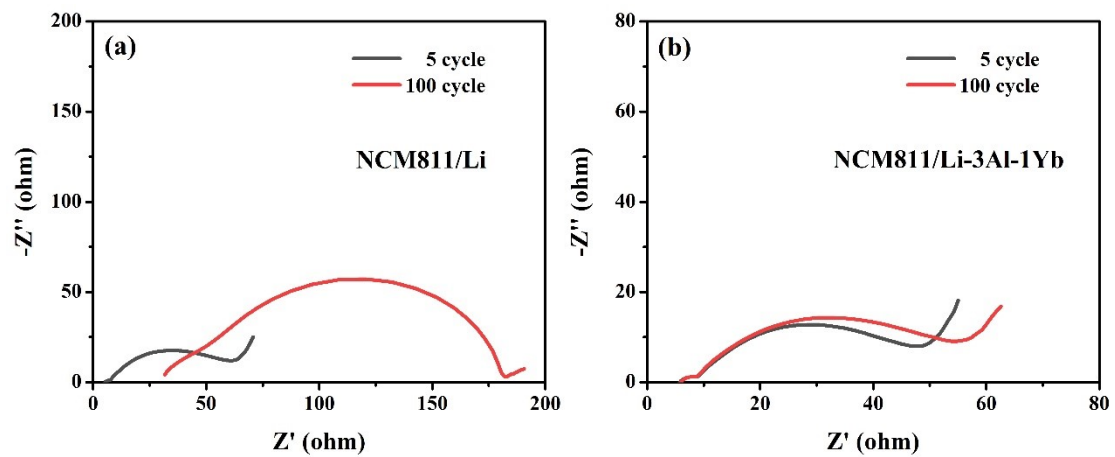

**Supplementary Figure 12** The impedance spectroscopy of the Li||NCM811 and Li-3Al-1Yb||NCM811 at 5th cycle and 100th cycle.

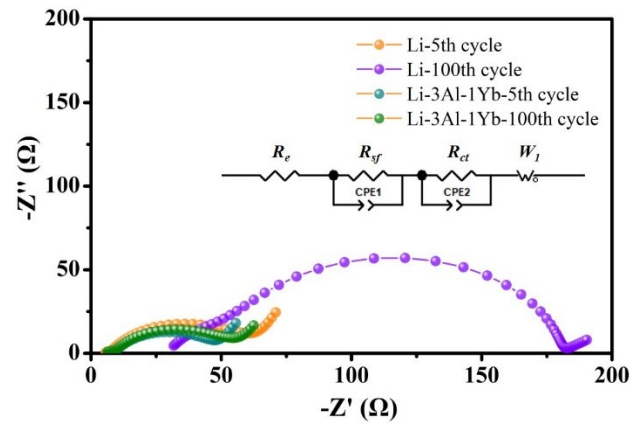

**Supplementary Figure 13** Nyquist plots of the Li||NCM811 and Li-3Al-1Yb||NCM811 at 5th cycle and 100th cycle after fitting.

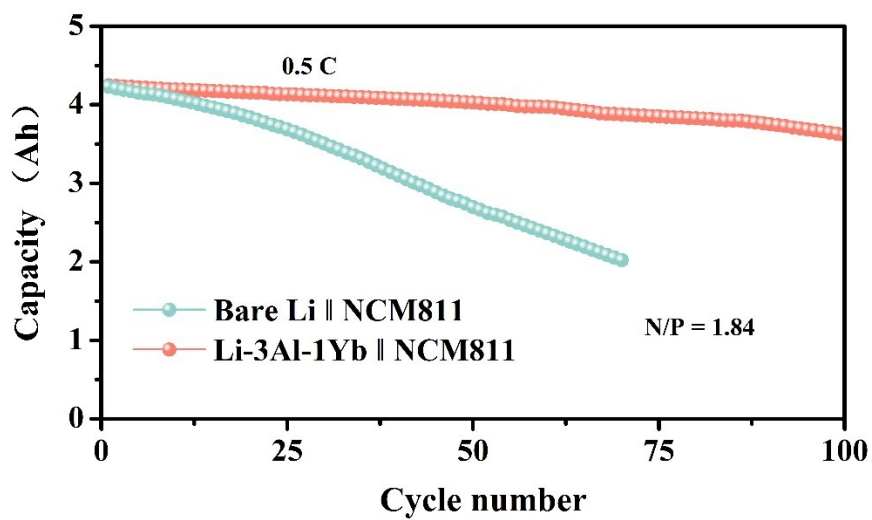

Supplementary Figure S14 Cycling performances of pouch cells (Li||NCM811 and Li-3Al-1Yb||NCM811) at 0.5 C.

**Table S1** the crystal structure, lattice parameters and atomic radius of  $\text{Al}_2\text{Yb}$ ,  $\text{Al}_2\text{Y}$ ,  $\text{AlB}_2$  and  $\beta\text{-Li}$ .

| Compound               | Crystal structure | Lattice parameters |          |
|------------------------|-------------------|--------------------|----------|
|                        |                   | <i>a</i>           | <i>c</i> |
| $\text{Al}_2\text{Yb}$ | fcc               | 0.788              | 0.788    |
| $\text{Al}_2\text{Y}$  | fcc               | 0.786              | 0.786    |
| $\text{AlB}_2$         | hex               | 0.301              | 0.326    |
| $\beta\text{-Li}$      | bcc               | 0.351              | 0.351    |



**Table S2** the disregistries of matched crystal plane between (100)Al<sub>2</sub>Yb with (100)β-Li, (110)β-Li and (111)β-Li.

|                         | (100)Al <sub>2</sub> Yb//(100)Li |       |       | (100)Al <sub>2</sub> Yb//(110)Li |                 |       | (100)Al <sub>2</sub> Yb//(111)Li |                 |                 |
|-------------------------|----------------------------------|-------|-------|----------------------------------|-----------------|-------|----------------------------------|-----------------|-----------------|
| [uvw]Al <sub>2</sub> Yb | [001]                            | [011] | [010] | [001]                            | [011]           | [010] | [001]                            | [011]           | [010]           |
| <i>d</i> [uvw]Li        | [001]                            | [011] | [010] | [ $\bar{1}$ 10]                  | [ $\bar{1}$ 11] | [001] | [ $\bar{1}$ 01]                  | [ $\bar{2}$ 11] | [ $\bar{1}$ 10] |
| [uvw]Al <sub>2</sub> Yb | 0.788                            | 0.557 | 0.788 | 0.788                            | 0.557           | 0.788 | 0.788                            | 0.557           | 0.788           |
| <i>d</i> [uvw]Li        | 0.351                            | 0.496 | 0.351 | 0.496                            | 0.304           | 0.351 | 0.496                            | 0.860           | 0.496           |
| $\theta$                | 0                                | 0     | 0     | 0                                | 10°             | 0     | 30°                              | 15°             | 0               |
| $\delta$                | 87.10%                           |       |       | 87.94%                           |                 |       | 44.63%                           |                 |                 |

**Table S3** the disregistries of matched crystal plane between (110)Al<sub>2</sub>Yb with (100)β-Li, (110)β-Li and (111)β-Li.

|                         | (110)Al <sub>2</sub> Yb//(100)Li |                 |       | (110)Al <sub>2</sub> Yb//(110)Li |                 |       | (110)Al <sub>2</sub> Yb//(111)Li |                 |                 |
|-------------------------|----------------------------------|-----------------|-------|----------------------------------|-----------------|-------|----------------------------------|-----------------|-----------------|
| [uvw]Al <sub>2</sub> Yb | [ $\bar{1}10$ ]                  | [ $\bar{1}11$ ] | [001] | [ $\bar{1}10$ ]                  | [ $\bar{1}11$ ] | [001] | [ $\bar{1}10$ ]                  | [ $\bar{1}11$ ] | [001]           |
| <i>d</i> [uvw]Li        | [001]                            | [011]           | [010] | [ $\bar{1}10$ ]                  | [ $\bar{1}11$ ] | [001] | [ $\bar{1}01$ ]                  | [ $\bar{2}11$ ] | [ $\bar{1}10$ ] |
| [uvw]Al <sub>2</sub> Yb | 0.557                            | 1.365           | 0.788 | 0.557                            | 1.365           | 0.788 | 0.557                            | 1.365           | 0.788           |
| <i>d</i> [uvw]Li        | 0.351                            | 0.496           | 0.351 | 0.496                            | 0.304           | 0.351 | 0.496                            | 0.860           | 0.496           |
| $\theta$                | 0                                | 10°             | 0     | 0                                | 0               | 0     | 30°                              | 25°             | 0               |
| $\delta$                | 118.07%                          |                 |       | 161.94%                          |                 |       | 35.16%                           |                 |                 |

**Table S4** the disregistries of matched crystal plane between (111)Al<sub>2</sub>Yb with (100)β-Li, (110)β-Li and (111)β-Li.

|                         | (111)Al <sub>2</sub> Yb//(100)Li |                 |                 | (111)Al <sub>2</sub> Yb//(110)Li |                 |                 | (111)Al <sub>2</sub> Yb//(111)Li |                 |                 |
|-------------------------|----------------------------------|-----------------|-----------------|----------------------------------|-----------------|-----------------|----------------------------------|-----------------|-----------------|
| [uvw]Al <sub>2</sub> Yb | [ $\bar{1}01$ ]                  | [ $\bar{2}11$ ] | [ $\bar{1}10$ ] | [ $\bar{1}01$ ]                  | [ $\bar{2}11$ ] | [ $\bar{1}10$ ] | [ $\bar{1}01$ ]                  | [ $\bar{2}11$ ] | [ $\bar{1}10$ ] |
| <i>d</i> [uvw]Li        | [001]                            | [011]           | [010]           | [ $\bar{1}10$ ]                  | [ $\bar{1}11$ ] | [001]           | [ $\bar{1}01$ ]                  | [ $\bar{2}11$ ] | [ $\bar{1}10$ ] |
| [uvw]Al <sub>2</sub> Yb | 0.557                            | 0.965           | 0.557           | 0.557                            | 0.965           | 0.557           | 0.557                            | 0.965           | 0.557           |
| <i>d</i> [uvw]Li        | 0.351                            | 0.496           | 0.351           | 0.496                            | 0.304           | 0.351           | 0.496                            | 0.860           | 0.496           |
| $\theta$                | 30°                              | 15°             | 0               | 30°                              | 25°             | 0               | 0                                | 0               | 0               |
| $\delta$                |                                  | 61.34%          |                 |                                  | 83.04%          |                 |                                  | 12.27%          |                 |

**Table S5** the disregistries of matched crystal plane between (100)Al<sub>2</sub>Y with (100) $\beta$ -Li, (110) $\beta$ -Li and (111) $\beta$ -Li.

|                        | (100)Al <sub>2</sub> Y//(100)Li |        |       | (100)Al <sub>2</sub> Y//(110)Li |                 |       | (100)Al <sub>2</sub> Y//(111)Li |                 |                 |
|------------------------|---------------------------------|--------|-------|---------------------------------|-----------------|-------|---------------------------------|-----------------|-----------------|
| [uvw]Al <sub>2</sub> Y | [001]                           | [011]  | [010] | [001]                           | [011]           | [010] | [001]                           | [011]           | [010]           |
| <i>d</i> [uvw]Li       | [001]                           | [011]  | [010] | [ $\bar{1}$ 10]                 | [ $\bar{1}$ 11] | [001] | [ $\bar{1}$ 01]                 | [ $\bar{2}$ 11] | [ $\bar{1}$ 10] |
| [uvw]Al <sub>2</sub> Y | 0.786                           | 0.556  | 0.786 | 0.786                           | 0.556           | 0.786 | 0.786                           | 0.556           | 0.786           |
| <i>d</i> [uvw]Li       | 0.351                           | 0.496  | 0.351 | 0.496                           | 0.304           | 0.351 | 0.496                           | 0.860           | 0.496           |
| $\theta$               | 0                               | 0      | 0     | 0                               | 10°             | 0     | 30°                             | 15°             | 0               |
| $\delta$               |                                 | 86.65% |       |                                 | 87.44%          |       |                                 | 44.44%          |                 |

**Table S6** the disregistries of matched crystal plane between (110)Al<sub>2</sub>Y with (100) $\beta$ -Li, (110) $\beta$ -Li and (111) $\beta$ -Li.

|                        | (110)Al <sub>2</sub> Y//(100)Li |                 |       | (110)Al <sub>2</sub> Y//(110)Li |                 |       | (110)Al <sub>2</sub> Y//(111)Li |                 |                 |
|------------------------|---------------------------------|-----------------|-------|---------------------------------|-----------------|-------|---------------------------------|-----------------|-----------------|
| [uvw]Al <sub>2</sub> Y | [ $\bar{1}10$ ]                 | [ $\bar{1}11$ ] | [001] | [ $\bar{1}10$ ]                 | [ $\bar{1}11$ ] | [001] | [ $\bar{1}10$ ]                 | [ $\bar{1}11$ ] | [001]           |
| <i>d</i> [uvw]Li       | [001]                           | [011]           | [010] | [ $\bar{1}10$ ]                 | [ $\bar{1}11$ ] | [001] | [ $\bar{1}01$ ]                 | [ $\bar{2}11$ ] | [ $\bar{1}10$ ] |
| [uvw]Al <sub>2</sub> Y | 0.556                           | 1.361           | 0.786 | 0.556                           | 1.361           | 0.786 | 0.556                           | 1.361           | 0.786           |
| <i>d</i> [uvw]Li       | 0.351                           | 0.496           | 0.351 | 0.496                           | 0.304           | 0.351 | 0.496                           | 0.860           | 0.496           |
| $\theta$               | 0                               | 10°             | 0     | 0                               | 0               | 0     | 30°                             | 25°             | 0               |
| $\delta$               | 117.56%                         |                 |       | 161.24%                         |                 |       | 34.89%                          |                 |                 |

**Table S7** the disregistries of matched crystal plane between (111)Al<sub>2</sub>Y with (100) $\beta$ -Li, (110) $\beta$ -Li and (111) $\beta$ -Li.

|                        | (111)Al <sub>2</sub> Y//(100)Li |                 |                 | (111)Al <sub>2</sub> Y//(110)Li |                 |                 | (111)Al <sub>2</sub> Y//(111)Li |                 |                 |
|------------------------|---------------------------------|-----------------|-----------------|---------------------------------|-----------------|-----------------|---------------------------------|-----------------|-----------------|
| [uvw]Al <sub>2</sub> Y | [ $\bar{1}01$ ]                 | [ $\bar{2}11$ ] | [ $\bar{1}10$ ] | [ $\bar{1}01$ ]                 | [ $\bar{2}11$ ] | [ $\bar{1}10$ ] | [ $\bar{1}01$ ]                 | [ $\bar{2}11$ ] | [ $\bar{1}10$ ] |
| <i>d</i> [uvw]Li       | [001]                           | [011]           | [010]           | [ $\bar{1}10$ ]                 | [ $\bar{1}11$ ] | [001]           | [ $\bar{1}01$ ]                 | [ $\bar{2}11$ ] | [ $\bar{1}10$ ] |
| [uvw]Al <sub>2</sub> Y | 0.556                           | 0.963           | 0.556           | 0.556                           | 0.963           | 0.556           | 0.556                           | 0.963           | 0.556           |
| <i>d</i> [uvw]Li       | 0.351                           | 0.496           | 0.351           | 0.496                           | 0.304           | 0.351           | 0.496                           | 0.860           | 0.496           |
| $\theta$               | 30°                             | 15°             | 0               | 30°                             | 25°             | 0               | 0                               | 0               | 0               |
| $\delta$               | 61.07%                          |                 |                 | 82.80%                          |                 |                 | 12.06%                          |                 |                 |

**Table S8** the disregistries of matched crystal plane between (100)AlB<sub>2</sub> with (100) $\beta$ -Li, (110) $\beta$ -Li and (111) $\beta$ -Li.

|                       | (100)AlB <sub>2</sub> //(100)Li |        |       | (100)AlB <sub>2</sub> //(110)Li |                 |       | (100)AlB <sub>2</sub> //(111)Li |                 |                 |
|-----------------------|---------------------------------|--------|-------|---------------------------------|-----------------|-------|---------------------------------|-----------------|-----------------|
| [uvw]AlB <sub>2</sub> | [0001]                          | [110]  | [20]  | [0001]                          | [110]           | [20]  | [0001]                          | [110]           | [20]            |
| <i>d</i> [uvw]Li      | [001]                           | [011]  | [010] | [ $\bar{1}$ 10]                 | [ $\bar{1}$ 11] | [001] | [ $\bar{1}$ 01]                 | [ $\bar{2}$ 11] | [ $\bar{1}$ 10] |
| [uvw]AlB <sub>2</sub> | 0.326                           | 0.444  | 0.301 | 0.326                           | 0.444           | 0.301 | 0.326                           | 0.444           | 0.301           |
| <i>d</i> [uvw]Li      | 0.351                           | 0.496  | 0.351 | 0.496                           | 0.304           | 0.351 | 0.496                           | 0.860           | 0.496           |
| $\theta$              | 0                               | 2.3°   | 0     | 0                               | 7.4°            | 0     | 30°                             | 17.3°           | 0               |
| $\delta$              |                                 | 10.64% |       |                                 | 31.18%          |       |                                 | 44.36%          |                 |

**Table S9** the disregistries of matched crystal plane between (0001)AlB<sub>2</sub> with (100) $\beta$ -Li, (110) $\beta$ -Li

and (111) $\beta$ -Li.

|                       | (0001)AlB <sub>2</sub> //(100)Li |        |       | (0001)AlB <sub>2</sub> //(110)Li |                 |       | (0001)AlB <sub>2</sub> //(111)Li |                 |                 |
|-----------------------|----------------------------------|--------|-------|----------------------------------|-----------------|-------|----------------------------------|-----------------|-----------------|
| [uvw]AlB <sub>2</sub> | [110]                            | [20]   | [20]  | [110]                            | [20]            | [20]  | [110]                            | [20]            | [20]            |
| <i>d</i> [uvw]Li      | [001]                            | [011]  | [010] | [ $\bar{1}$ 10]                  | [ $\bar{1}$ 11] | [001] | [ $\bar{1}$ 01]                  | [ $\bar{2}$ 11] | [ $\bar{1}$ 10] |
| [uvw]AlB <sub>2</sub> | 0.301                            | 0.521  | 0.301 | 0.301                            | 0.521           | 0.301 | 0.301                            | 0.521           | 0.301           |
| <i>d</i> [uvw]Li      | 0.351                            | 0.496  | 0.351 | 0.496                            | 0.304           | 0.351 | 0.496                            | 0.860           | 0.496           |
| $\theta$              | 30°                              | 15°    | 0     | 30°                              | 24.7°           | 0     | 0                                | 0               | 0               |
| $\delta$              |                                  | 13.87% |       |                                  | 39.13%          |       |                                  | 39.35%          |                 |

**Table S10** Cell parameters of the Li|NCM811 pouch cell.



|                | Parameter                       | Value                     |
|----------------|---------------------------------|---------------------------|
| NCM811 cathode | Discharge capacity              | 200 mAh g <sup>-1</sup>   |
|                | Active material loading         | 95.94%                    |
|                | Area weight (each side)         | 14 mg cm <sup>-2</sup>    |
|                | Area capacity (each side)       | 2.8 mAh cm <sup>-2</sup>  |
|                | Electrode density               | 3.41 g cm <sup>-3</sup>   |
|                | Electrode thickness (each side) | 48.3 μm                   |
| Al foil        | Thickness                       | 12 μm                     |
| Li anode       | Specific capacity               | 3860 mAh g <sup>-1</sup>  |
|                | Anode thickness (each side)     | 25 μm                     |
|                | Area capacity (each side)       | 5.15 mAh cm <sup>-2</sup> |
|                | N/P ratio                       | 1.84                      |
| Electrolyte    | E/C ratio                       | 2.5 g Ah <sup>-1</sup>    |
| Separator      | Thickness                       | 16 μm                     |
|                | Average voltage                 | 3.8 V                     |
|                | Capacity                        | ≥4.1Ah                    |
|                | Energy density                  | ≥390 Wh kg <sup>-1</sup>  |

$$\text{Cathode mass} = (14 * 7.7 * 9.7 * 2 * 10 / 1000) \text{ g} = 20.91 \text{ g}$$

$$\text{Anode mass} = (0.534 * 7.7 * 9.7 * 2 * 25 * 10 / 10000) \text{ g} = 1.99 \text{ g}$$

$$\text{Al foil mass} = (2.7 * 7.7 * 9.7 * 12 * 10 / 10000) \text{ g} = 2.41 \text{ g}$$

$$\text{Separator mass} = (1.43 * 16 * 7.7 * 9.7 * 10 / 10000) \text{ g} = 1.70 \text{ g}$$

$$\text{Electrolyte mass} = (4.15 * 2.5) \text{ g} = 10.37 \text{ g}$$

$$\text{Package foil mass} = (0.0181 * 8 * 10 * 2) \text{ g} = 2.89 \text{ g}$$

$$\text{The total mass} = 40.27 \text{ g}$$

$$\text{The total energy density} = (4.148 * 3.8 / 40.27) * 1000 = 391.6 \text{ Wh kg}^{-1}$$

**Table S11** the fitting results of Nyquist plots for Li||NCM811 and Li-3Al-1Yb||NCM811 at 5th

cycle and 100th cycle.

| Sample                 | $R_e$ (ohm) | $R_{sf}$ (ohm) | $R_{ct}$ (ohm) |
|------------------------|-------------|----------------|----------------|
| Li-5th cycle           | 5.434       | 1.372          | 46.4           |
| Li-100th cycle         | 29.61       | 27.91          | 122.6          |
| Li-3Al-1Yb-5th cycle   | 5.967       | 2.553          | 38.37          |
| Li-3Al-1Yb-100th cycle | 6.17        | 2.907          | 40.76          |
